# Supplementary material for: CRISPR/Cas9-based genome editing in mice uncovers 13 testis- or epididymis-enriched genes individually dispensable for male reproduction
Source: PubMed Central journal article supplement (PMC7401351; doi:10.1093/biolre/ioaa083), 2020-05-26
Supplement: si_r1_ioaa083.pdf [file si_r1_ioaa083.pdf]

**Supplementary Table S1.** Single-guide RNAs targeting the genes' upstream (U) and downstream (D) regions used for generating knockout mice. Efficiency of embryo transplantation was presented using the number of total pups delivered by pseudopregnant mice divided by the number of total embryos used for oviduct transplantation (Total pups/embryos transplanted). Efficiency of genome editing was determined by the number of pups carrying enzymatic mutations divided by the number of pups subjected to genotyping (GM pups/pups genotyped).

| Gene symbol          | KO strategy            | Total pups/embryos transplanted | GM pups/pups genotyped | PAM | sgRNA sequences |                        |
|----------------------|------------------------|---------------------------------|------------------------|-----|-----------------|------------------------|
| <i>4921507P07Rik</i> | Zygote electroporation | 14/90 (15.6%)                   | 3/14 (21.5%)           | CGG | U               | GGCCGAATAGTTGTTTCGTA   |
|                      |                        |                                 |                        | AGG | D               | AACAGAATCCAGCCAAATGC   |
| <i>Allc</i>          | Zygote electroporation | 15/56 (27%)                     | 1/15 (6%)              | GGG | U               | GATTTGGCCTCTGAGTGCCT   |
|                      |                        |                                 |                        | AGG | D               | TAGGGAACCCCTTGAGCCGA   |
| <i>Cabs1</i>         | Zygote injection       | 15/77 (19%)                     | 5/11 (45%)             | TGG | U               | AGTCATTTACTGAAGTAACG   |
| <i>Fam229b</i>       | Zygote electroporation | 16/75 (21%)                     | 15/16 (94%)            | AGG | U               | CTTCTTGAGCCCGCTAGCTA   |
|                      |                        |                                 |                        | GGG | D               | ATCATTAAAGTCTTCTGTCTGA |
| <i>Fscb</i>          | Zygote electroporation | 17/100 (23%)                    | 10/17 (59%)            | AGG | U               | CCTGAAGAGCCTATATCATT   |
|                      |                        |                                 |                        | AGG | D               | TAAAGAAGTCTGAGCTATCGTC |
| <i>Hdgfl1</i>        | Zygote electroporation | 15/80 (18.8%)                   | 9/15 (60%)             | AGG | U               | AGCAGCAGCGGGACCTCTCG   |
|                      |                        |                                 |                        | GGG | D               | GTTGAAGACTGGGCCCTAGT   |
| <i>lqca</i>          | Zygote electroporation | 20/80 (25%)                     | 5/20 (25%)             | AGG | U               | GTTCCCCCAACTTCGGCAGT   |
|                      |                        |                                 |                        | AGG | D               | TCTTCTCTCTCGGTACAC     |
| <i>Lelp1</i>         | Zygote electroporation | 6/33 (18%)                      | 3/6 (50%)              | AGG | U               | TGAAAGCTTCTCGAGAAAAC   |
|                      |                        |                                 |                        | AGG | D               | CCATGCCTACCCCGAAAGTG   |
| <i>Spata24</i>       | Zygote electroporation | 16/40 (40%)                     | 13/16 (81%)            | GGG | U               | ACAGAGCACCTGGCAACCG    |
|                      |                        |                                 |                        | AGG | D               | GACAGTGCCACTGCTCATGG   |
| <i>Tmem97</i>        | Zygote electroporation | 4/46 (8.7%)                     | 3/4 (75%)              | TGG | U               | CAGCTAGGCGCTGTGTCTGAG  |
|                      |                        |                                 |                        | TGG | D               | GCAGTGCTGTGGTAGCGCTT   |
| <i>Eddm3b</i>        | Zygote electroporation | 10/79 (13%)                     | 1/10 (10%)             | GGG | U               | TCAGGCCTTGGTCACCGTCC   |
| <i>Lrcol1</i>        | Zygote electroporation | 6/81 (7.4%)                     | 3/6 (50%)              | TGG | U               | GTGAGATGTCTGTCTCGGTG   |
|                      |                        |                                 |                        | TGG | D               | CACATTCCAAAAACACGGTC   |
| <i>Tmem114</i>       | Zygote electroporation | 20/65 (30.8%)                   | 11/20 (55%)            | TGG | U               | TGCGGGTGGGATCGCGTAAG   |
|                      |                        |                                 |                        | TGG | D               | CCAGGAGGCGCAGGGCCTTT   |

**Supplementary Table S2.** Primers and PCR conditions used for genotyping.

| Gene symbol          | Allele | Forward primer          | Reverse primer          | Band size | Annealing  | Elongation  |
|----------------------|--------|-------------------------|-------------------------|-----------|------------|-------------|
| <i>4921507P07Rik</i> | WT     | TAAGCCTCTGGTTTTGTGC     | TACTCATGCTTTGCCTTCTCC   | 400 bp    | 65°C, 30 s | 72°C, 30 s  |
|                      | KO     | TAAGCCTCTGGTTTTGTGC     | GTCAGGACATTATTTGGTCC    | 346 bp    | 65°C, 30 s | 72°C, 30 s  |
| <i>Allc</i>          | WT     | GCCTTGCTGTGTTGTAAGCC    | ATGGACTTGGGTTCCACCGAC   | 856 bp    | 65°C, 30 s | 72°C, 1 min |
|                      | KO     | CAGAGCTCTCACCGTTCTC     | AGCACCATAGGGTATGTA      | 649 bp    | 65°C, 30 s | 72°C, 45 s  |
| <i>Cabs1</i>         | WT     | CTGTGAGAGTGCTCAGTGCC    | CCCTTAGGTTTGGAGTTTGG    | 350 bp    | 65°C, 30 s | 72°C, 30 s  |
|                      | KO     | CTGTGAGAGTGCTCAGTGCC    | CCCTTAGGTTTGGAGTTTGG    | 345 bp    | 65°C, 30 s | 72°C, 30 s  |
| <i>Fam229b</i>       | WT     | AGGCAGGAAGCTATGTGAAGG   | TACACAAGGGATAGGAAAGGTGA | 422 bp    | 65°C, 30 s | 72°C, 30 s  |
|                      | KO     | AGGCAGGAAGCTATGTGAAGG   | GCTTAGCATGCAGAGCGCTC    | 347 bp    | 65°C, 30 s | 72°C, 30 s  |
| <i>Fscb</i>          | WT     | GGAAGTGTAGAAGACCTGACTGC | GAGAACTTCAGCAGAGCCC     | 502 bp    | 65°C, 30 s | 72°C, 30 s  |
|                      | KO     | GTCCTAACAGAAACAAACCAAG  | TAAGCAATCATTGTCCATGG    | 545 bp    | 65°C, 30 s | 72°C, 30 s  |
| <i>Hdgf1</i>         | WT     | ACCAACATTTCTTAACATGG    | ACAAAGTTGATGTCAACTGG    | 1514 bp   | 60°C, 30 s | 60°C, 30 s  |
|                      | KO     | ACCAACATTTCTTAACATGG    | ACAAAGTTGATGTCAACTGG    | 419 bp    | 60°C, 30 s | 60°C, 30 s  |
| <i>lqca</i>          | WT     | GGGGTTGCTTGTGGAAACAC    | TCAACAGCCTTCCTTCGAGT    | 461 bp    | 63°C, 30 s | 72°C, 60 s  |
|                      | KO     | CGGCTCACATAAACAGGGCA    | TCCATCAAGAACGGAGGTGAG   | 978 bp    | 63°C, 30 s | 72°C, 60 s  |
| <i>Lelp1</i>         | WT     | CCATGCCTACCCCGAAAGTG    | CAGCCCCACAATGTTGTAGG    | 968 bp    | 65°C, 30 s | 65°C, 30 s  |
|                      | KO     | CCATGCCTACCCCGAAAGTG    | CAGCCCCACAATGTTGTAGG    | 509 bp    | 65°C, 30 s | 65°C, 30 s  |
| <i>Spata24</i>       | WT     | TCTGTTGCAGATGGTTCTCC    | CAGGACTCTGCTCTTGACAC    | 542 bp    | 65°C, 30 s | 72°C, 30 s  |
|                      | KO     | TTGGGGGATGAAATCCAGTC    | AGCTCAGTAGAGGCGGGTGC    | 199 bp    | 55°C, 30 s | 72°C, 30 s  |
| <i>Tmem97</i>        | WT     | GTGACCATCTAGGCCAATGG    | GGCAATATACTAACCTAAGG    | 591 bp    | 60°C, 30 s | 72°C, 30 s  |
|                      | KO     | CTATAGCCCCGCTATATGGG    | GGTGAGGTGCCAGAGTAGGG    | 552 bp    | 65°C, 30 s | 72°C, 30 s  |
| <i>Eddm3b</i>        | WT     | CAAAAGAGAGGGCATATAGGAGG | AGCAGAAGCAGGGCCAGGC     | 296 bp    | 65°C, 30 s | 72°C, 30 s  |
|                      | KO     | CAAAAGAGAGGGCATATAGGAGG | GAGCAGAAGCAGGGCCTTTT    | 292 bp    | 65°C, 30 s | 72°C, 30 s  |
| <i>Lrcol1</i>        | WT     | CAGCCAGGGCTACACGGAAA    | GATGGGGCTGCATGACGATTGGG | 491 bp    | 65°C, 30 s | 72°C, 30 s  |
|                      | KO     | CAGCCAGGGCTACACGGAAA    | GGTCTTTGATGAGCAGAACC    | 489 bp    | 65°C, 30 s | 72°C, 30 s  |
| <i>Tmem114</i>       | WT     | ACTCAGTCTGATCGTGATGG    | TCCGCTGCTTCTACTTGTGG    | 567 bp    | 60°C, 30 s | 60°C, 30 s  |
|                      | KO     | GGACGCTCGCCCCGATCCGG    | AAAACCTACGGGTGACTAGG    | 587 bp    | 60°C, 30 s | 60°C, 30 s  |

**Supplementary Table S3.** Sanger sequencing of mutant alleles in all mouse lines. Bases in uppercase indicate exon sequences and the ones in lowercase indicate intron sequences.

| Gene symbol          | Upstream sequence (25 bp) | Mutation                | Downstream sequence (25 bp) |
|----------------------|---------------------------|-------------------------|-----------------------------|
| <i>4921507P07Rik</i> | TACTCTAACGGACTGCACACCCCGT | -22195                  | GGCTGGATTCTGTTTCTGTATTAAG   |
| <i>Allc</i>          | GCAGCTGATTGATTTGGCCTCTGAG | -19639                  | gggaagtatttttagaattatcctc   |
| <i>Cabs1</i>         | AACTATTACCTCGGAAGGAGACCAC | -5                      | TTCAGTAAATGACTGCACACCGGAT   |
| <i>Fam229b</i>       | TTGGCCTATTTTGTAAGTCTATGT  | -3266 +17*              | TTCAGTAAATGACTGCACACCGGAT   |
| <i>Fscb</i>          | AATGTGAAGAACCTGAAGAGCCTAT | -3166                   | AGGTGTAACTTAAACTAATAATTT    |
|                      | AATGTGAAGAACCTGAAGAGCCTAT | -3164                   | TCAGGTGTAACTTAAACTAATAAT    |
| <i>Hdgf1</i>         | aggaagcgttgccagcatcctcgag | -1095                   | GGGACAGGCCAGTTGACATCAACTT   |
| <i>lqca</i>          | CTAGGGGGAGTTCCCCAACTTCGG  | -107633                 | AGAGGAGGAAGAGAGTTTTAAGgta   |
| <i>Lelp1</i>         | aggcccctaagaacacctgcttact | -577bp+118 <sup>#</sup> | AGTGAGGCACCATGGGCAACTCTCC   |
| <i>Spata24</i>       | CCTTGCGAACAGAGGAAGTCCCCGC | -5638                   | ACTGTCTGTCTGCCTCCTATAGCAA   |
| <i>Tmem97</i>        | GGGCCCTGGCAGCTAGGCGCTGTGT | -8286                   | CGTACCACAGCACTGCTAAAAGG     |
| <i>Tmem114</i>       | TGGGCCGGAGCACGTGCGGGTGGGA | -15261                  | CCCATCTCAGTGATGGCAACCTTT    |
| <i>Eddm3b</i>        | CCTGCTCTGATGTCCTCTCTAAAAG | -5                      | GCCCTGCTTCTGCTCCTGCTGTGCC   |
| <i>Lrcol1</i>        | GGTCCAACGTGAGATGTCTGTCTCG | -1196                   | AATGTGTGCCCTGGAGGAAGGTGAC   |

\*+17: TTTCTTGAGCCCGCTAG

<sup>#</sup>+118:GAAGCTTTCAATGTGTTTCAGTCTCTGGACCATCTCATTAAAGAGCTGCTTGTCTGTGGACTTGGGGTATGTCTAGATGCCTGCACTCTGATTTCTCTTACTTTGTTTCCATTCTAG

**Supplementary Table S4.** Testis weight relative to body weight in wild-type and mutant males.

| <b>Gene symbol</b> | <b>Testis/body weight (<math>\times 10^3</math>)</b> | <b>No. of males</b> | <b>No. of testis</b> |
|--------------------|------------------------------------------------------|---------------------|----------------------|
| Wild-type          | 3.0 $\pm$ 0.4                                        | 6                   | 12                   |
| <i>Fam229b</i>     | 3.3 $\pm$ 0.1                                        | 3                   | 6                    |
| <i>Lqca</i>        | 3.2 $\pm$ 0.0                                        | 2                   | 4                    |
| <i>Lelp1</i>       | 4.2 $\pm$ 0.4                                        | 2                   | 4                    |
| <i>Spata24</i>     | 3.8 $\pm$ 0.6                                        | 2                   | 4                    |
| <i>Tmem114</i>     | 3.2 $\pm$ 0.5                                        | 3                   | 6                    |

**Supplementary Table S5.** The 13 knockout mouse lines in this study. The RBRC No. and CARD ID are available for the mouse lines that have been deposited as frozen sperm to Riken BioResource Research Center and Center for Animal Resources and Development at Kumamoto University, respectively.

| <b>Gene symbol</b>   | <b>Gene name</b>                                | <b>RBRC No.</b> | <b>CARD ID</b> |
|----------------------|-------------------------------------------------|-----------------|----------------|
| <i>4921507P07Rik</i> | RIKEN cDNA 4921507P07 gene                      | 11050           | 2957           |
| <i>Allc</i>          | Allantoicase                                    | 11054           | 2961           |
| <i>Cabs1</i>         | Calcium binding protein, spermatid associated 1 | 10333           | 2703           |
| <i>Fam229b</i>       | Family with sequence similarity 229, member B   | 11035           | 2942           |
| <i>Fscb</i>          | Fibrous sheath CABYR binding protein            | 11063           | 2970           |
| <i>Hdgf1</i>         | HDGF like 1                                     | 11018           | 2925           |
| <i>Iqca</i>          | IQ motif containing with AAA domain             | TBD             | TBD            |
| <i>Lelp1</i>         | Late cornified envelope-like proline-rich 1     | TBD             | TBD            |
| <i>Spata24</i>       | Spermatogenesis associated 24                   | TBD             | TBD            |
| <i>Tmem97</i>        | Transmembrane protein 97                        | 11025           | 2932           |
| <i>Eddm3b</i>        | Epididymal protein 3B                           | 10345           | 2715           |
| <i>Lrcol1</i>        | Leucine rich colipase like 1                    | TBD             | TBD            |
| <i>Tmem114</i>       | Transmembrane protein 114                       | TBD             | TBD            |

**Supplementary Table S6.** Additional information about the 13 mouse genes analyzed in this study. The presence of transmembrane (TM) domains and a signal peptide was predicted using TMHMM and SignalP, respectively.

| Gene symbol          | NCBI UID | MGI ID  | Chromosome | No. of TM domain | Signal peptide | Human orthologs |
|----------------------|----------|---------|------------|------------------|----------------|-----------------|
| <i>4921507P07Rik</i> | 70821    | 1918071 | 6          | 0                | N              | <i>C7orf31</i>  |
| <i>Allc</i>          | 94041    | 2136971 | 6          | 0                | N              | <i>ALLC</i>     |
| <i>Cabs1</i>         | 70977    | 1918227 | 5          | 0                | N              | <i>CABS1</i>    |
| <i>Fam229b</i>       | 66337    | 1913587 | 10         | 0                | N              | <i>FAM229B</i>  |
| <i>Fscb</i>          | 623046   | 3646964 | 12         | 0                | N              | <i>FSCB</i>     |
| <i>Hdgfl1</i>        | 15192    | 1194493 | 13         | 0                | N              | <i>HDGFL1</i>   |
| <i>Iqca</i>          | 74918    | 1922168 | 1          | 0                | N              | <i>IQCA1</i>    |
| <i>Lelp1</i>         | 149018   | 1916582 | 1          | 0                | N              | <i>LELP1</i>    |
| <i>Spata24</i>       | 71242    | 1918492 | 18         | 0                | N              | <i>SPATA24</i>  |
| <i>Tmem97</i>        | 69071    | 1916321 | 10         | 4                | N              | <i>TMEM97</i>   |
| <i>Eddm3b</i>        | 219026   | 2684921 | 14         | 0                | Y              | <i>EDDM3B</i>   |
| <i>Lrcol1</i>        | 381667   | 2686525 | 5          | 1                | Y              | <i>LROCL1</i>   |
| <i>Tmem114</i>       | 74720    | 1921970 | 16         | 4                | Y              | <i>TMEM114</i>  |

4921507P07Rik<sup>+/+</sup> Upstream

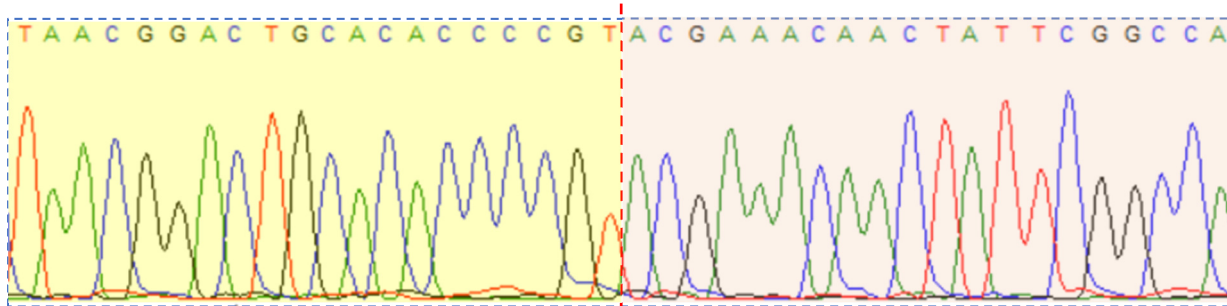

4921507P07Rik<sup>-22195/-22195</sup>

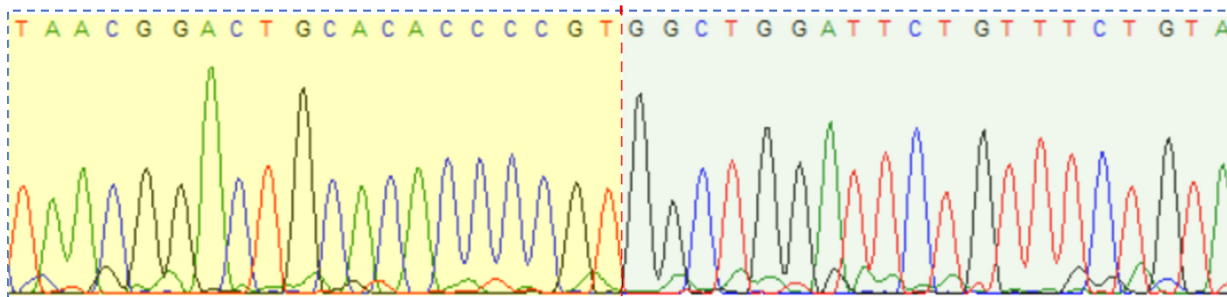

4921507P07Rik<sup>+/+</sup> Downstream

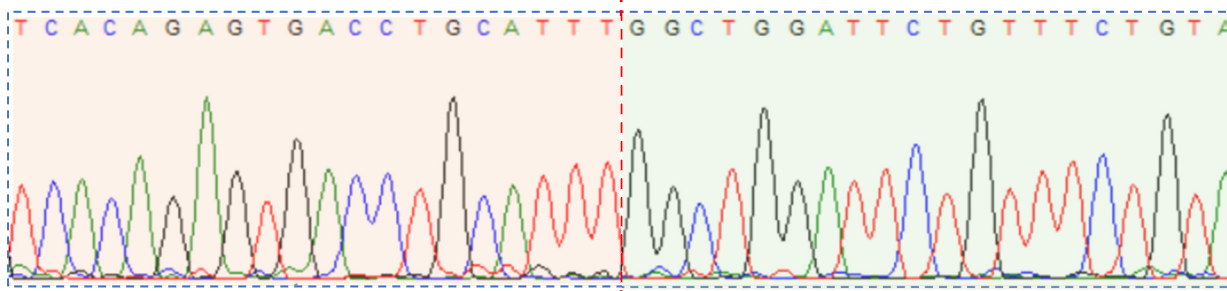

**Supplementary Figure S1.** Sanger sequencing of *4921507P07Rik* wild-type and knockout alleles. The upper and lower graphs indicate the upstream and downstream sequences of the wild-type allele, whereas the middle graph shows the knockout allele. The sequences deleted in the knockout mice are highlighted in red. The regions immediately upstream and downstream of the deletion are highlighted in yellow and green, respectively.

**(A) Het.**

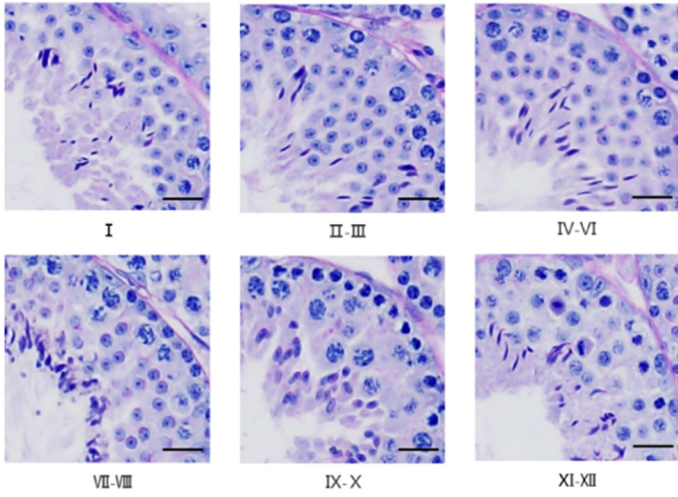

**(B) Homo.**

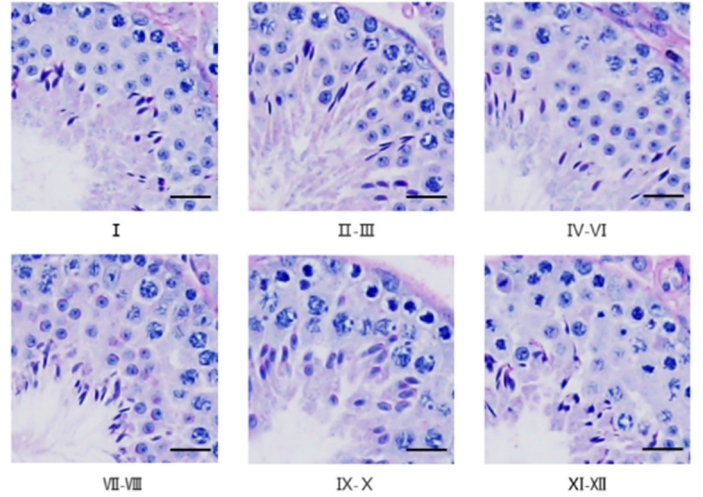

**Supplementary Figure S2.** Detailed analyses of spermatogenesis in **(A)** *A/lc* heterozygous and **(B)** homozygous knockout mice. Scale bars = 20  $\mu$ m.



**(A) Het.**

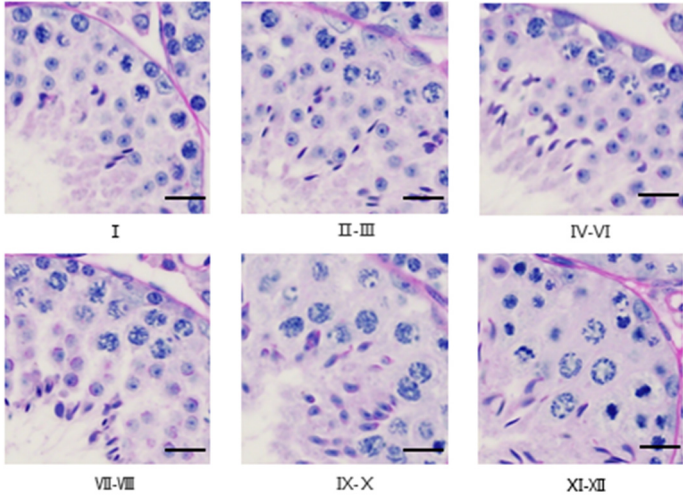

**(B) Homo.**

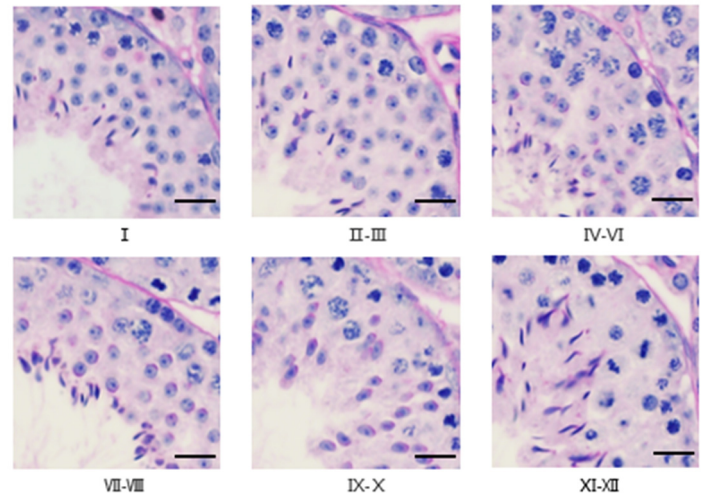

**Supplementary Figure S3.** Detailed analyses of spermatogenesis in **(A)** *Fscb* heterozygous and **(B)** homozygous knockout mice. Scale bars = 20  $\mu\text{m}$ .

**(A) Het.**

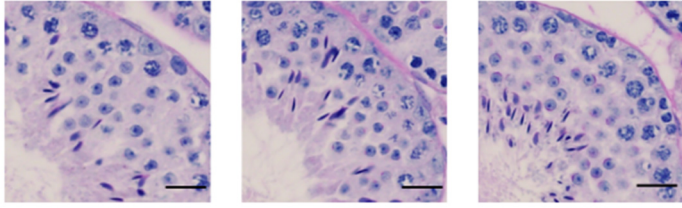

I

II-III

IV-VI

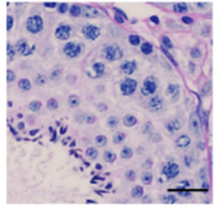

VII-VIII

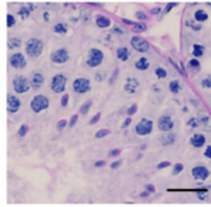

IX-X

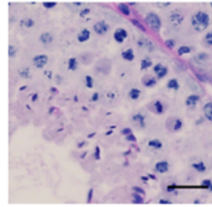

XI-XII

**(B) Homo.**

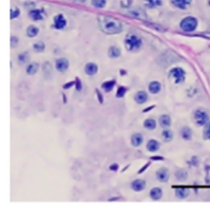

I

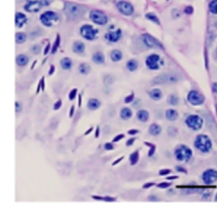

II-III

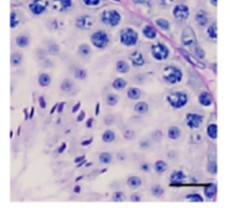

IV-VI

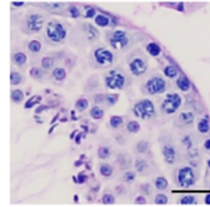

VII-VIII

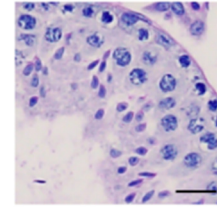

IX-X

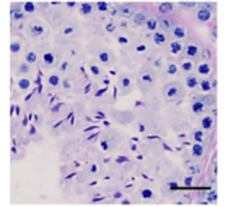

XI-XII

**Supplementary Figure S4.** Detailed analyses of spermatogenesis in **(A)** *4921507P07Rik* heterozygous and **(B)** homozygous knockout mice. Scale bars = 20  $\mu$ m.

(A)

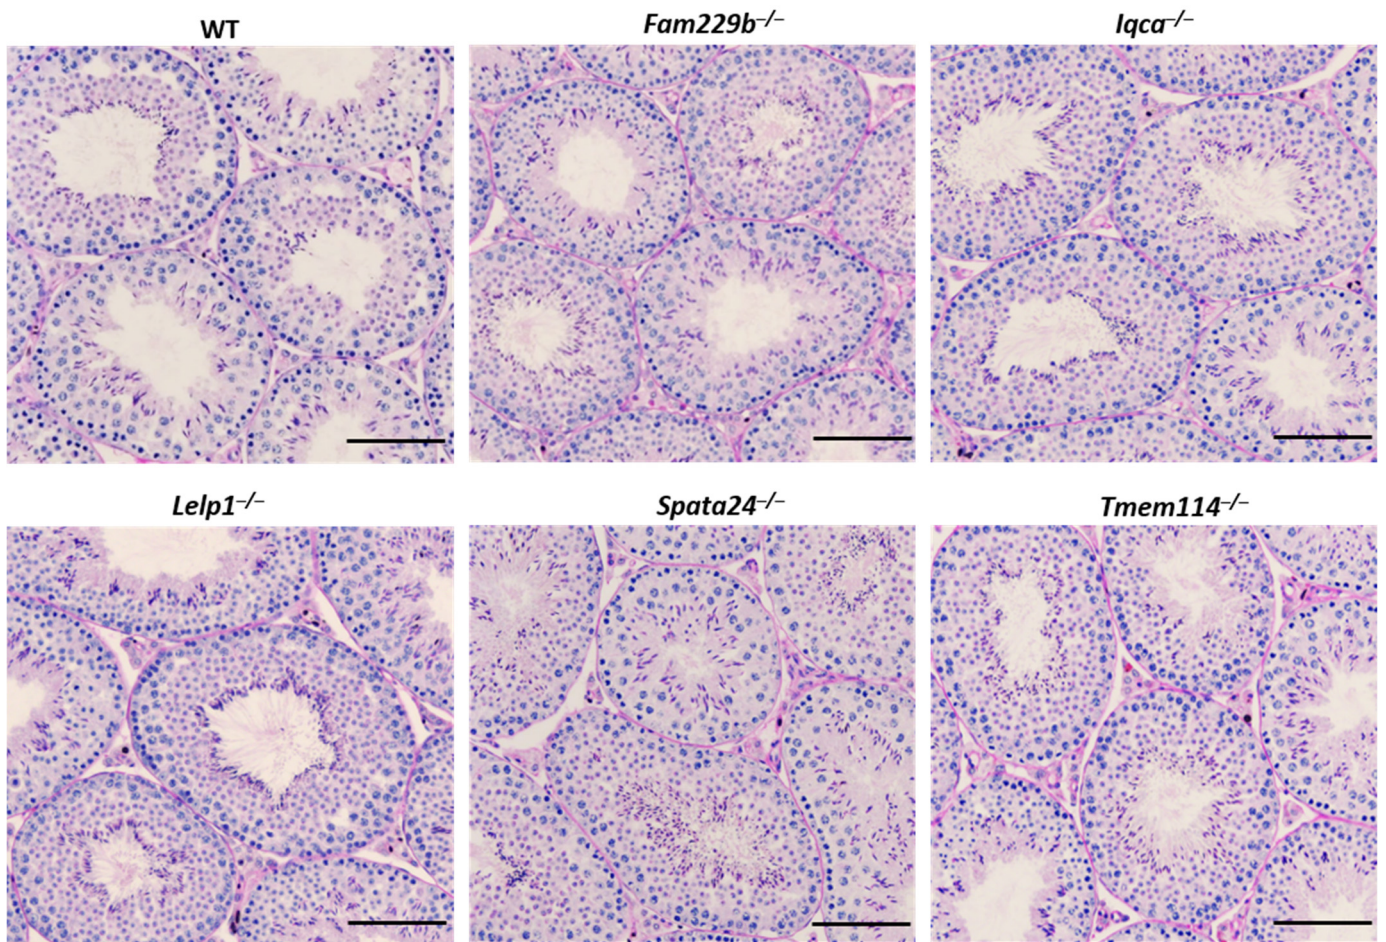

(B)

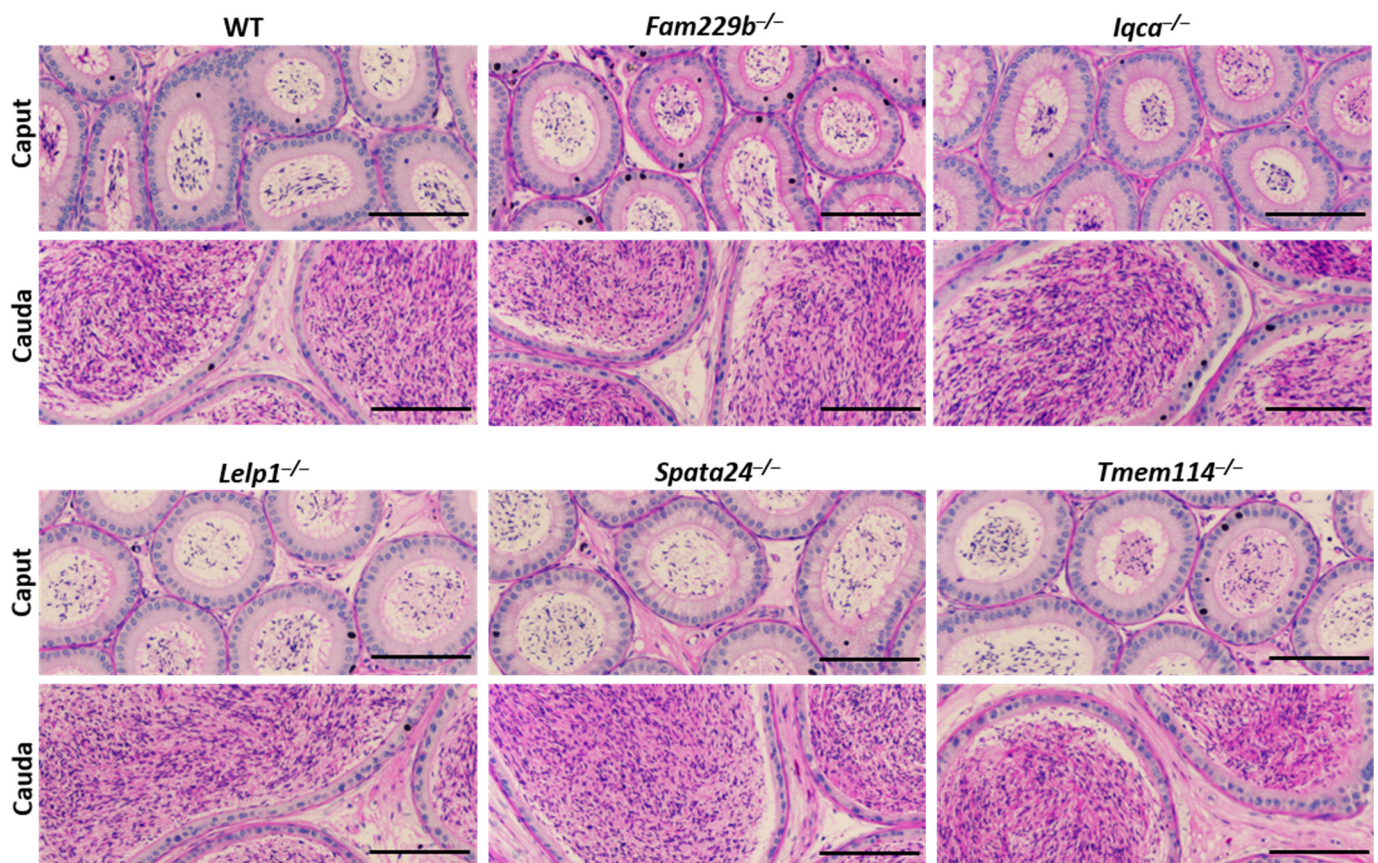

**Supplementary Figure S5.** Histological analyses of (A) testes and (B) epididymides in *Fam229b*, *lqca*, *Lelp1*, *Spata24* and *Tmem114* knockout males. Scale bars = 100  $\mu$ m.

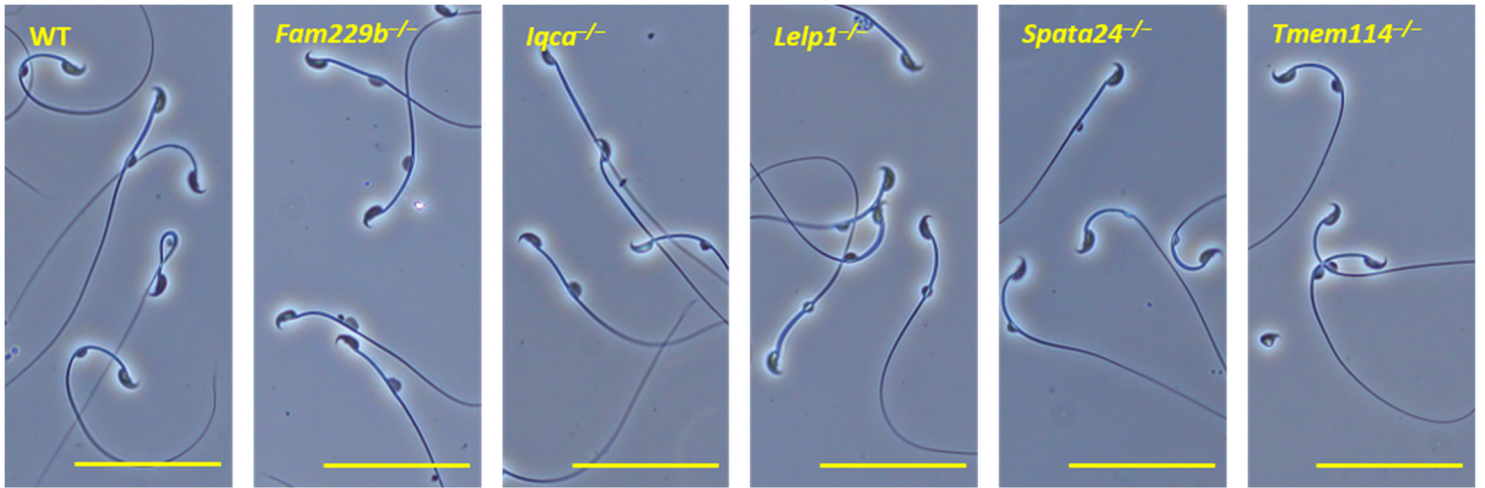

**Supplementary Figure S6.** Morphology of spermatozoa in *Fam229b*, *lqca*, *Lelp1*, *Spata24* and *Tmem114* knockout males. Scale bars = 50  $\mu$ m.





**(M) TMEM114**

```
Human 1 MRVHLGGLAGAAALSGALSFVLLAAAIGTDFWYIIDTERLERITGPGAQILLGGINRSQEPPLSSHSGLWRTCVRVQSECTPLMNPFRLENVTVSESSRQLLTMHGTFVILL 110
Mouse 1 MRVHLGGLAGAAALSGALSFVLLAAAIGTDFWYIIDTERLERSSQRMRDQ-EPANRSQEPPLSSHSGLWRTCVRVQSECTPLMNPFWQENVTVSESSRQLLTMHGTFVILL 109

Human 111 PLSLILMVFVGGMTGFLSFLLEKYLKLLLLLTGILFLFGAMVTLAGISVYIAYSAAAFREALCLLEEKALLDQVDHSFGWSLALGWISFIAELLTGAMFLAAARELSLRQRD 220
Mouse 110 PLSLIVMVFVGGMTGFLSFLLEKYLKLLLLLTGILFLFGAMVTLAGISVYIAYSAAAFREALCLLEERALLDQVDHSFGWSLALGWISFVSELLTGAVFLAAARELSLRQRD 219

Human 221 QAI 223
Mouse 220 QAI 222
```

**Supplementary Figure S7.** Alignment of mouse and human peptide sequences encoded by each gene. Dark regions indicate identities between mouse and human sequences. **(A)** 4921507P07Rik. **(B)** ALLC. **(C)** CABS1 **(D)** FAM229B. **(E)** FSCB. **(F)** HDGFL1. **(G)** IQCA. **(H)** LELP1. **(I)** SPATA24. **(J)** TMEM97. **(K)** EDDM3B. **(L)** LRCOL1. **(M)** TMEM114.

## ***Cabs1***

**Wild-type** MAEDGSPKIYSRPPRDNSKTPTEADIFFGADNTIPKSETTITSEGDHVTS...LKEEPDDLMM\*  
**Mutant** MAEDGSPKIYSRPPRDNSKTPTEADIFFGADNTIPKSETTITSEGDHFSK\*

**Supplementary Figure S8.** Amino acid sequences encoded by wild-type and mutant *Cabs1*.



### ***Eddm3b***

**Wild-type**    MSLVPALMSSLKAWALLLLLLLCLQ...EDIKALEPIL\*  
**Mutant**        MSLVPALMSSLKGPASAPAVPAA\*

**Supplementary Figure S9.** Amino acid sequences encoded by wild-type and mutant *Eddm3b*.
